# Supplementary material
Source: PubMed Central journal article supplement (PMC9539235)
Supplement: TRF-62-1779-s001.pdf [file TRF-62-1779-s001.pdf]

## Supplementary Figure 1

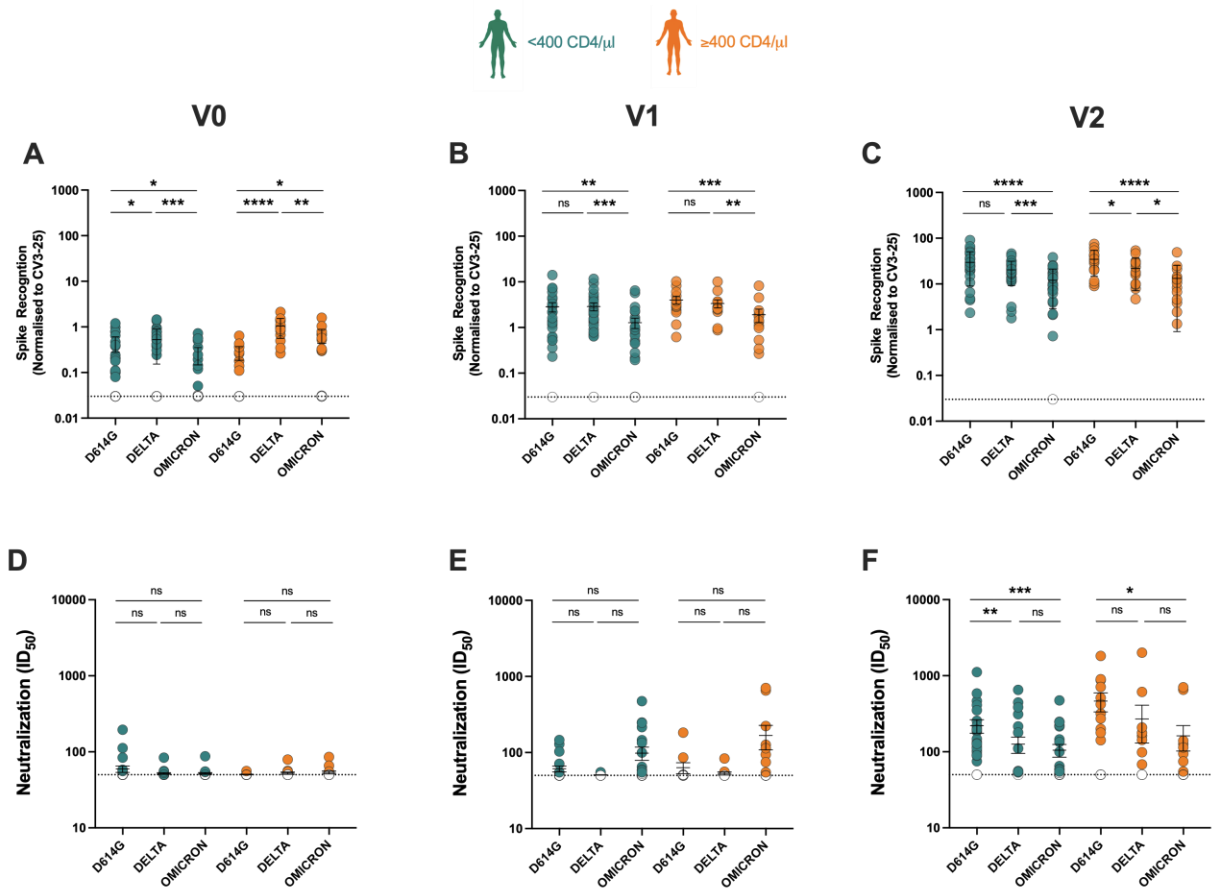

**Supplementary Figure 1. Spike recognition and neutralization activity of antibodies within plasma of apheresis platelet donors at each timepoint.** 293T cells were transfected with full length Spike from D614G, Delta and Omicron variants and stained with the CV3-25 Ab or with plasma collected from apheresis donors at timepoints V0 (A), V1 (B) and V2 (C) and analysed by flow cytometry. Median fluorescence intensity (MFI) of Spike recognition was normalized with CV3-25 Ab binding. Threshold levels for seropositivity (0.03) are represented by dotted lines. Error bars represent the mean  $\pm$  SEM. Neutralization activity was determined as described

in the Materials and Methods against pseudovirions bearing D614G, Delta and Omicron Spikes with plasma collected at timepoints V0 (D), V1(E) and V2 (F). Each dot represents one donor. Threshold levels for positive detection are represented by the dotted line. Statistical significance was tested using Friedman's test (\* $p < 0.05$ ; \*\* $p < 0.01$ ; \*\*\* $p < 0.001$ ; \*\*\*\* $p < 0.0001$ ; ns, non-significant).

## Supplementary Figure 2

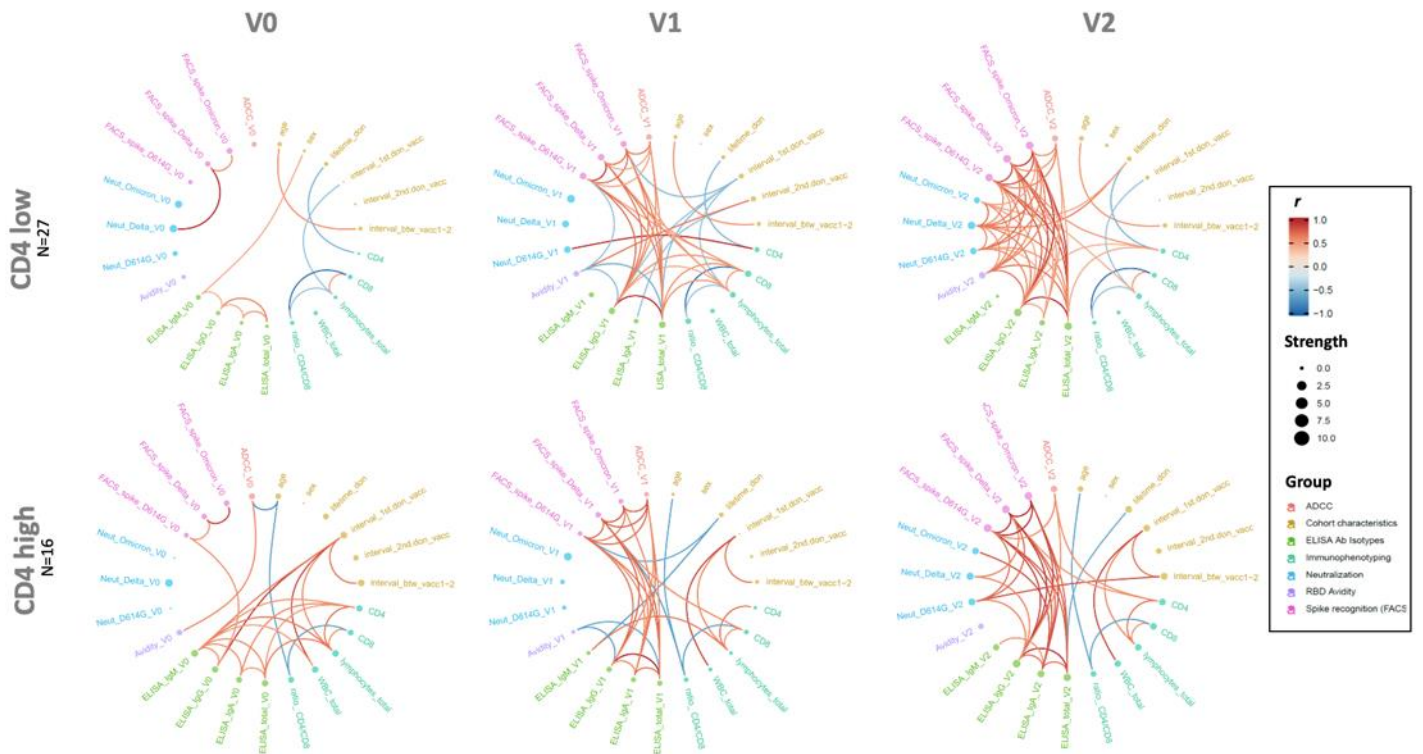

**Supplementary Fig 2. Network model of correlations between humoral responses in CD4-low and CD4-high separated based on timepoints.** Edge bundling plots are shown for correlation analyses using both CD4-low (A) and CD4-high (B) data sets at different timepoints. Red and blue edges represent positive and negative pairwise correlations between connected parameters, respectively. Only significant correlations ( $p < 0.05$ , Spearman rank test) are displayed. Nodes are color-coded based on the grouping of variables according to the legend (where  $r$  is the Spearman correlation coefficient; Group categorises the different variables). Node size corresponds to the degree of relatedness of correlations.
